# Supplementary material
Source: HighWire-hosted journal article supplement (https://sti.bmj.com/content/93/7/493)
Supplement: inline-supplementary-material-1 [file inline-supplementary-material-1.docx]

**Supplementary Data**

The French interview extracts are given in the same order as in English paper.

A journey full of pitfalls

- *« J’étais à une sorte de comptoir et j’imagine que j’étais supposé raconter à peu près pourquoi j’étais là, avec du monde partout autour. J’étais au milieu des jambes pétées, des gosses qui hurlent… Et au bout de deux heures et demi, on m’a dit d’aller “directement” en Maladies Infectieuses ! »* (Respondent 10)
- *« Je me suis retrouvé un samedi matin dans le couloir du service. Tout le monde passait devant moi, les femmes de ménage, les patients, les infirmières… Les médecins finissaient leur visite à l’étage, impossible de les voir avant. »* (Respondent 6)
- *« J’ai été vu par une dame. Puis plus rien pendant une heure et demie. J’ai attendu sur un siège. La consultation a dû durer cinq minutes… Après j’ai attendu encore une grosse demi-heure pour la prise de sang. »* (Respondent 7)
- *« Ils vous filent deux-trois cachets histoire de tenir quelques jours et après tu dois trouver la pharmacie… Ca veut dire revenir à l’hôpital, te reconfronter à un pharmacien qui sait exactement pourquoi tu viens quand il voit ton ordonnance. En plus, c’est impossible à trouver quand tu connais pas. »* (Respondent 10)

A stressful situation

- *« Quand je suis rentré chez moi, je sentais que c’était bizarre, je me sentais mouillé. Je suis allé aux toilettes et… j’ai retiré le bout de la capote, avec plein de sperme à l’intérieur. Ca avait craqué et* [mon partenaire, au sauna] *ne m’avait rien dit. J’étais mort de trouille. Je suis parti en oubliant de fermer la porte. »* (Respondent 8)
- *« Sur internet, j’avais lu que le traitement n’était plus efficace au bout de quatre heures. Enfin… moins efficace. Ca m’a étonné de voir que personne ne se dépêchait. J’ai attendu des heures au total alors que j’aurais pu commencer à prendre le traitement dès le début. C’est assez contradictoire. »* (Respondent 6)
- *« Tu te retrouves dans un couloir d’hôpital, l’attente m’a paru insupportable. C’était en pleine nuit, il y avait une lumière glauque et des gens qui passaient en blanc. J’ai toujours détesté les hôpitaux. »* (Respondent 3)
- *« J’avais honte d’être là, dans un bureau en pleine nuit, à devoir raconter ma partie de jambes en l’air… D’ailleurs, j’ai masqué ça en le faisant passer pour un accident de capote. Je n’assumais pas. »* (Respondent 4)

Face-to-face with the infectiologist

- *« Il avait l’air hyper jeune. Je me souviens qu’il ne s’était pas présenté, ça m’avait choqué. Quand même, tu racontes ta vie sexuelle à un type sans savoir qui c’est ! »* (Respondent 3)
- *« Elle a tenu des propos qui m’ont scandalisé. Je te jure ! En gros, elle me disait : “Vous n’auriez pas été vous faire mettre dans une backroom, vous n’en seriez pas là.”. Ce n’était pas formulé comme ça mais franchement, c’est exactement ça que ça voulait dire. »* (Respondent 8)
- *« Je me suis senti jugé trois fois en tant qu’homo. La première, c’était par ma mère, quand elle a appris que j’étais gai. La deuxième fois, c’était à l’armée, on m’a écarté de certaines missions, soit disant pour des raisons de sécurité. Et la troisième fois, c’est quand je me suis retrouvé avec ce médecin. Il était méprisant. »* (Respondent 9)
- *« Il me disait de sucer avec une capote, à mettre des gants pour doigter, ou des trucs dans le genre. Je me souviens avoir rigolé quand il m’a dit ça. J’avais envie de lui dire : “Tu as déjà baisé dans ta vie ?”. »* (Respondent 6)

Treatment tolerance

- *« J’ai cru que j’allais crever, je passais mes journées aux toilettes, à vomir, avec la diarrhée, la pire gastro que j’ai jamais eue. J’étais crevé en permanence. »* (Respondent 5)

Subsequent use of PEP

- *« Vous n’imaginez pas comme je me suis fait engueuler par mon amie* [à qui il venait de raconter sa rupture de préservatif, la veille, avec un inconnu]*. Elle était prête à m’emmener en voiture. Mais c’était hors de question. Trop de mauvais souvenirs, le sentiment d’être jugé, le traitement que j’ai pas supporté… »* (Respondent 7)
- *« Faudrait vraiment qu’il y ait un gros risque. Là, j’imagine que j’y retournerai, si je sens que mon copain est en danger, par exemple. »* (Respondent 6)
